# Supplementary material
Source: publisher site journal article supplement (https://www.spandidos-publications.com/2480/downloadSupplementary)

Figure S1. Results of correlation analysis between splenic volume and other clinical variables are shown.

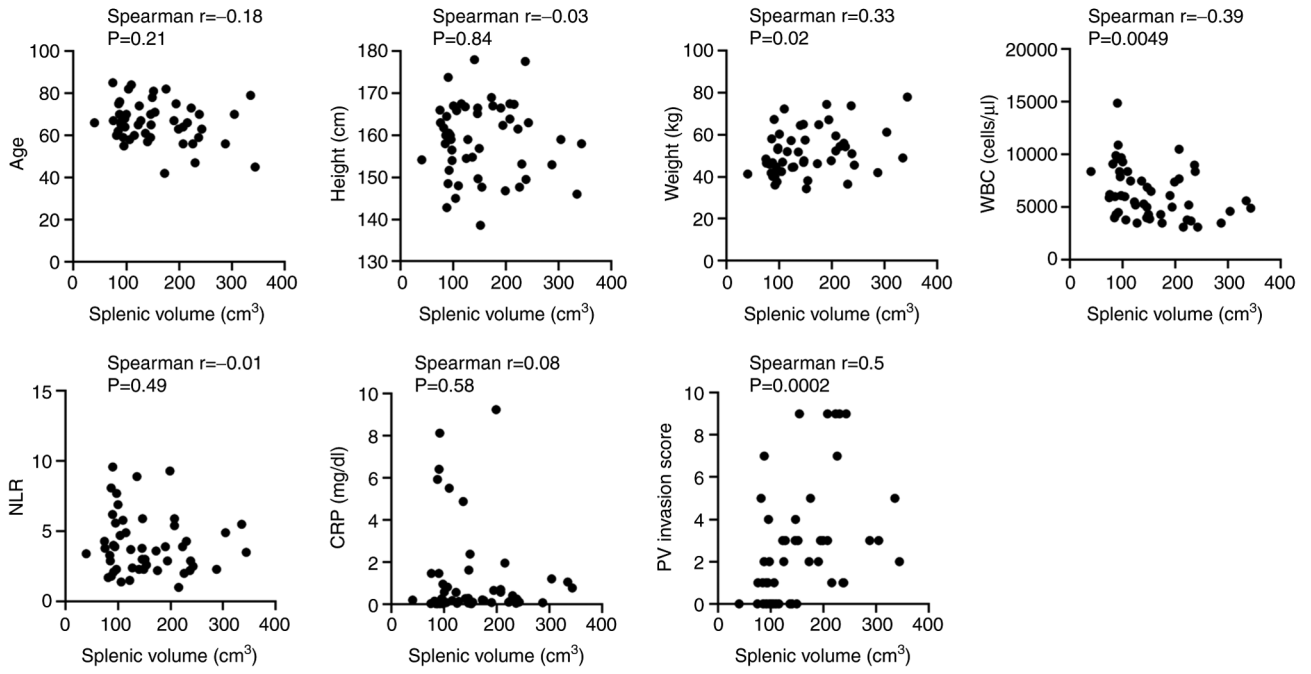

Supplement: Supplementary file 1 [file downloadSupplementary]
